# Supplementary material
Source: PubMed Central journal article supplement (PMC8612122)
Supplement: NIHMS1727343-supplement-Appendix.pdf [file NIHMS1727343-supplement-Appendix.pdf]

# THE LANCET

## **Supplementary appendix**

This appendix formed part of the original submission and has been peer reviewed.  
We post it as supplied by the authors.

Supplement to: Heilmann A, Mehay A, Watt RG, et al. Physical punishment and child outcomes: a narrative review of prospective studies. *Lancet* 2021; published online June 28. [http://dx.doi.org/10.1016/S0140-6736\(21\)00582-1](http://dx.doi.org/10.1016/S0140-6736(21)00582-1).

**Appendix Table A1: Search syntax by database**

| Database       | Search terms and filters                                                                                                                                                                                                                                                                                                                                                                                                                                                                                                                                                                                                                                                                                                                                                                                                                                                                                                                                                                                                                                                                                                                                                                                                                                                                                                                                                                                                                                                                                                                                                                                                                                                                                                                                                                                                                                                                                                                                                                                                                                                                                                           |
|----------------|------------------------------------------------------------------------------------------------------------------------------------------------------------------------------------------------------------------------------------------------------------------------------------------------------------------------------------------------------------------------------------------------------------------------------------------------------------------------------------------------------------------------------------------------------------------------------------------------------------------------------------------------------------------------------------------------------------------------------------------------------------------------------------------------------------------------------------------------------------------------------------------------------------------------------------------------------------------------------------------------------------------------------------------------------------------------------------------------------------------------------------------------------------------------------------------------------------------------------------------------------------------------------------------------------------------------------------------------------------------------------------------------------------------------------------------------------------------------------------------------------------------------------------------------------------------------------------------------------------------------------------------------------------------------------------------------------------------------------------------------------------------------------------------------------------------------------------------------------------------------------------------------------------------------------------------------------------------------------------------------------------------------------------------------------------------------------------------------------------------------------------|
| Pubmed/Medline | <p>Search: physical discipline [tw] OR physical punishment [tw] OR corporal punishment [tw] OR physical chastisement [tw] OR smack* [tw] OR spank* [tw] OR slap* [tw]</p> <p>Filters: tw (Title, Abstract, MeSH headings and Subheadings (includes single words and phrases), Other Terms field (which includes author-supplied keywords)); 2002&gt;onwards; Journal Article; Humans.</p>                                                                                                                                                                                                                                                                                                                                                                                                                                                                                                                                                                                                                                                                                                                                                                                                                                                                                                                                                                                                                                                                                                                                                                                                                                                                                                                                                                                                                                                                                                                                                                                                                                                                                                                                          |
| PsychInfo      | <p>Search: in title or abstract: "physical discipline" OR "physical punishment" OR "corporal punishment" OR "physical chastisement" OR smack* OR spank* OR slap*</p> <p>Filters: 2002-current; human</p>                                                                                                                                                                                                                                                                                                                                                                                                                                                                                                                                                                                                                                                                                                                                                                                                                                                                                                                                                                                                                                                                                                                                                                                                                                                                                                                                                                                                                                                                                                                                                                                                                                                                                                                                                                                                                                                                                                                           |
| Web of Science | <p>Topic search: "physical discipline" OR "physical punishment" OR "corporal punishment" OR "physical chastisement" OR smack* OR spank* OR slap*</p> <p>Filters: 2002&gt;onwards; document types: article OR review; excluding proceedings paper OR book chapter OR retracted publication OR data paper; excluding Web of Science categories: (chemistry analytical or engineering civil or biotechnology applied microbiology or computer science artificial intelligence or geology or optics or spectroscopy or film radio television or water resources or veterinary sciences or agriculture dairy animal science or marine freshwater biology or chemistry physical or energy fuels or computer science information systems or engineering mechanical or engineering biomedical or food science technology or nanoscience nanotechnology or physics applied or geosciences multidisciplinary or engineering multidisciplinary or history or materials science multidisciplinary or language linguistics or telecommunications or literature or zoology or anthropology or medieval renaissance studies or parasitology or geochemistry geophysics or chemistry multidisciplinary or plant sciences or engineering electrical electronic or engineering chemical or audiology speech language pathology or mechanics or linguistics or automation control systems or biophysics or computer science interdisciplinary applications or acoustics or physics particles fields or orthopedics or archaeology or sport sciences or business or evolutionary biology or surgery or hematology or hospitality leisure sport tourism or management or music or physics multidisciplinary or art or microbiology or obstetrics gynecology or literary theory criticism or public administration or pharmacology pharmacy or chemistry medicinal or chemistry organic or classics or physics nuclear or geography or astronomy astrophysics or economics or infectious diseases or international relations or literature romance or theater or mathematics applied or meteorology atmospheric sciences or regional urban planning)</p> |

**Appendix Table A2: Characteristics of included studies, grouped by outcome**

| Author/ year                                     | Country | Dataset / study population                                                                             | Sample size | Analysis method            | Outcome(s) as described by authors | Follow up period                                     | Findings (main effect)                                             | Comments                                               |
|--------------------------------------------------|---------|--------------------------------------------------------------------------------------------------------|-------------|----------------------------|------------------------------------|------------------------------------------------------|--------------------------------------------------------------------|--------------------------------------------------------|
| <b>Externalising behaviour problems</b>          |         |                                                                                                        |             |                            |                                    |                                                      |                                                                    |                                                        |
| Akcinar and Baydar 2016 <sup>45</sup>            | Turkey  | Early Childhood Developmental Ecologies in Turkey Study                                                | 1,009       | Cross-lagged path analysis | Externalising behaviour            | 4 years; age at baseline 36-47 months; 4 time points | Detrimental                                                        | Reciprocal associations                                |
| Bakoula et al. 2009 <sup>22</sup>                | Greece  | Greek Birth Cohort                                                                                     | 2065        | Regression models          | Externalising behaviour            | 11 years; age at baseline 7 years                    | No main effect; Mixed: detrimental for boys / beneficial for girls | Moderation by sex                                      |
| Barajas-Gonzalez et al. 2018 <sup>54</sup>       | USA     | Mexican and Dominican American immigrant families                                                      | 633         | Regression models          | Externalising behaviour            | 1 year; age at baseline 4 years                      | No associations                                                    |                                                        |
| Barnes et al. 2013 <sup>46</sup>                 | USA     | Early Childhood Longitudinal Study, Birth Cohort                                                       | 750         | Cross-lagged path analysis | Externalising behaviour            | 1-2 years; age at baseline 4 years                   | Detrimental                                                        | Reciprocal effects                                     |
| Baumrind, Larzelere and Owens 2010 <sup>55</sup> | USA     | Baumrind's Family Socialization Project                                                                | 87          | MANCOVA; regression models | Externalising behaviour            | 10 years, mean age at baseline 5 years               | No associations                                                    |                                                        |
| Beauchaine et al 2005 <sup>48</sup>              | USA     | Children with oppositional defiant disorder / conduct disorder who took part in interventional studies | 514         | Latent growth curve models | Externalising behaviour            | 1 year; age at baseline 3-8 years                    | Detrimental                                                        | Experimental data from RCTs                            |
| Callender et al. 2012 <sup>49</sup>              | USA     | Children at risk for school age conduct problems                                                       | 245         | Structural equation models | Externalising behaviour            | 2-3 years; age at baseline 3 years                   | Detrimental                                                        |                                                        |
| Coley, Kull and Carrano 2014 <sup>27</sup>       | USA     | Three City Study - low-income urban African American and Hispanic families                             | 592         | Cross-lagged path analysis | Externalising behaviour            | 6 years; age at baseline 3 years; 3 time points      | Detrimental                                                        | No reciprocal effects; no moderation by race/ethnicity |
| Gershoff et al. 2012 <sup>40</sup>               | USA     | Early Childhood Longitudinal Study – Kindergarten Cohort                                               | 10 044      | Cross-lagged path analysis | Externalising behaviour            | 3 years; age at baseline 5 years                     | Detrimental                                                        | Not moderated by race/ethnicity; reciprocal effects    |

| Author/ year                                    | Country | Dataset / study population                                                                               | Sample size  | Analysis method                        | Outcome(s) as described by authors | Follow up period                                | Findings (main effect) | Comments                                                   |
|-------------------------------------------------|---------|----------------------------------------------------------------------------------------------------------|--------------|----------------------------------------|------------------------------------|-------------------------------------------------|------------------------|------------------------------------------------------------|
| Gershoff, Sattler and Ansari 2018 <sup>41</sup> | USA     | Early Childhood Longitudinal Study – Kindergarten Cohort                                                 | 12 112       | Propensity score matching              | Externalising behaviour            | 3 years; age at baseline 5 years                | Detrimental            |                                                            |
| Gibson and Fagan 2018 <sup>50</sup>             | USA     | Longitudinal Study of Child Abuse and Neglect                                                            | 1075         | Multilevel growth models               | Externalising behaviour            | 12 years; age at baseline 4-8 years             | Detrimental            | Moderation by race/ethnicity                               |
| Grogan-Kaylor 2005a <sup>47</sup>               | USA     | National Longitudinal Survey of Youth                                                                    | 1943         | Fixed effects models                   | Externalising behaviour            | 6 years; age 4-14 years; 4 time points          | Detrimental            | Not moderated by neighbourhood quality                     |
| Laible et al. 2020 <sup>51</sup>                | USA     | National Institute of Child Health and Human Development Study of Early Child Care and Youth Development | 1364         | Cross-lagged path analysis             | Externalising behaviour            | 5 years; age at baseline 3 years; 4 time points | Detrimental            |                                                            |
| Lansford et al. 2009 <sup>42</sup>              | USA     | Study 1: Child Development Project                                                                       | Study 1: 499 | Modelling of trajectory groups, ANCOVA | Externalising behaviour            | Study 1: 13 years (age 5-16)                    | Study 1: Detrimental   | Not moderated by sex or race/ethnicity                     |
| Lansford et al. 2009 <sup>42</sup>              | USA     | Study 2: Pitt Mother-Child Project                                                                       | Study 2: 258 | Modelling of trajectory groups, ANCOVA | Externalising behaviour            | Study 2: 5 years (age 10-15)                    | Study 2: Detrimental   | Not moderated by sex or race/ethnicity                     |
| Lansford et al. 2012a <sup>43</sup>             | USA     | Child Development Project                                                                                | 585          | Structural equation models             | Externalising behaviour            | 4 years; age at baseline 5 years                | Detrimental            | Moderation by race/ethnicity                               |
| Lansford et al. 2012b <sup>44</sup>             | USA     | Child Development Project                                                                                | 585          | ANCOVA and cross-lagged path analysis  | Externalising behaviour            | 2 years; age at baseline 6 years; 3 time points | No associations        |                                                            |
| MacKenzie et al. 2012 <sup>36</sup>             | USA     | Fragile Families and Child Wellbeing Study                                                               | 1110         | Regression models                      | Externalising behaviour            | 2 years; age at baseline 3 years                | Detrimental            |                                                            |
| MacKenzie et al. 2013 <sup>37</sup>             | USA     | Fragile Families and Child Wellbeing Study                                                               | 1933         | Regression models                      | Externalising behaviour            | 6 years; age at baseline 3 years                | Detrimental            | Not moderated by sex or race/ethnicity; dose-response      |
| MacKenzie et al. 2015 <sup>35</sup>             | USA     | Fragile Families and Child Wellbeing Study                                                               | 1874         | Cross-lagged path analysis             | Externalising behaviour            | 8 years; age at baseline 1 year; 4 time points  | Detrimental            | Not moderated by sex or race/ethnicity; reciprocal effects |

| Author/ year                                  | Country | Dataset / study population                                                                               | Sample size | Analysis method                       | Outcome(s) as described by authors | Follow up period                                  | Findings (main effect)                                 | Comments                                                               |
|-----------------------------------------------|---------|----------------------------------------------------------------------------------------------------------|-------------|---------------------------------------|------------------------------------|---------------------------------------------------|--------------------------------------------------------|------------------------------------------------------------------------|
| Mendez et al. 2016 <sup>21</sup>              | USA     | Family Transition project                                                                                | 218         | Regression models                     | Externalising behaviour            | 1 year; age at baseline 2 years                   | Mixed: detrimental / no association                    | Fathers' (not mothers') punishment associated with later externalising |
| Mulvaney and Mebert 2007 <sup>52</sup>        | USA     | National Institute of Child Health and Human Development Study of Early Child Care and Youth Development | 1028        | Regression models                     | Externalising behaviour            | 6 years; age at baseline 15 months; 4 time points | Detrimental                                            | Not moderated by race/ethnicity                                        |
| O'Gara et al. 2020 <sup>56</sup>              | USA     | Latinos in Context Study                                                                                 | 141         | Multigroup cross-lagged path analysis | Externalising behaviour            | 2 years; age at baseline 4 years; 3 time points   | No associations                                        | Not moderated by race/ethnicity                                        |
| Petts and Kysar-Moon 2012 <sup>39</sup>       | USA     | Fragile Families and Child Wellbeing Study                                                               | 1214        | Regression models                     | Externalising behaviour            | 2 years; age at baseline 3 years                  | Detrimental                                            | Moderation by religious affiliation                                    |
| Xing et al. 2011 <sup>20</sup>                | China   | Sample of Chinese elementary school-aged children                                                        | 454         | Structural equation models            | Externalising behaviour            | 6 months; mean age at baseline 10 years           | Mixed: detrimental for girls / no association for boys | Moderation by sex                                                      |
| Yoo and Huang 2013 <sup>38</sup>              | USA     | Fragile Families and Child Wellbeing Study                                                               | 1234        | Structural equation models            | Externalising behaviour            | 5 years; followed from birth; 4 time points       | Detrimental                                            |                                                                        |
| Yu et al. 2018 <sup>53</sup>                  | USA     | Sample of Chinese Americans                                                                              | 163         | Bayesian path analysis                | Externalising behaviour            | 6 months; age at baseline 3-5 years               | Detrimental                                            | Moderation by acculturation                                            |
| <b>Aggressive behaviour</b>                   |         |                                                                                                          |             |                                       |                                    |                                                   |                                                        |                                                                        |
| Altschul, Lee and Gershoff 2016 <sup>57</sup> | USA     | Fragile Families and Child Wellbeing Study                                                               | 3279        | Cross-lagged path analysis            | Aggressive behaviour               | 2 years; age at baseline 3 years                  | Detrimental                                            | Reciprocal effects                                                     |
| Gershoff et al. 2016 <sup>30</sup>            | USA     | Head Start Impact Study                                                                                  | 2063        | Cross-lagged path analysis            | Aggressive behaviour               | 1.5 years; age at baseline 3 years; 3 time points | Detrimental                                            |                                                                        |
| Grogan-Kaylor et al. 2020 <sup>58</sup>       | USA     | Fragile Families and Child Wellbeing Study                                                               | 2703        | Bayesian regression methods           | Aggressive behaviour               | 2 years; age at baseline 3 years                  | Detrimental                                            | Not moderated by neighbourhood disadvantage                            |
| Gromoske and Maguire-Jack 2012 <sup>59</sup>  | USA     | Fragile Families and Child Wellbeing Study                                                               | 3870        | Cross-lagged path analysis            | Aggressive behaviour               | 4 years; age at baseline 1 year; 3 time points    | Detrimental                                            | Reciprocal effects                                                     |

| Author/ year                                         | Country     | Dataset / study population                                           | Sample size | Analysis method            | Outcome(s) as described by authors | Follow up period                                 | Findings (main effect) | Comments                                             |
|------------------------------------------------------|-------------|----------------------------------------------------------------------|-------------|----------------------------|------------------------------------|--------------------------------------------------|------------------------|------------------------------------------------------|
| Lee, Altschul and Gershoff 2013 <sup>60</sup>        | USA         | Fragile Families and Child Wellbeing Study                           | 3279        | Cross-lagged path analysis | Aggressive behaviour               | 4 years; age at baseline 1 year; 3 time points   | Detrimental            | Not moderated by maternal warmth; reciprocal effects |
| Lee et al. 2013 <sup>61</sup>                        | USA         | Fragile Families and Child Wellbeing Study                           | 923         | Regression models          | Aggressive behaviour               | 2 years; age at baseline 3 years                 | Detrimental            | Dose-response                                        |
| Lee, Altschul, and Gershoff 2015 <sup>62</sup>       | USA         | Fragile Families and Child Wellbeing Study                           | 1298        | Cross-lagged path analysis | Aggressive behaviour               | 2 years; age at baseline 3 years                 | Detrimental            | Reciprocal effects for mothers; NS for fathers       |
| Lee et al. 2020 <sup>63</sup>                        | USA         | Fragile Families and Child Wellbeing Study                           | 4149        | Cross-lagged path analysis | Aggressive behaviour               | 9 years; age at baseline 1 year                  | Detrimental            | Moderation by household income; reciprocal effects   |
| Ma and Grogan-Kaylor 2017 <sup>64</sup>              | USA         | Fragile Families and Child Wellbeing Study                           | 3705        | Hierarchical linear models | Aggressive behaviour               | 2 years; age at baseline 3 years                 | Detrimental            | Dose-response                                        |
| Ma, Grogan-Kaylor and Lee 2018 <sup>65</sup>         | USA         | Fragile Families and Child Wellbeing Study                           | 2472        | Fixed effects models       | Aggressive behaviour               | 2 years; age at baseline 3 years                 | Detrimental            |                                                      |
| Ma, Grogan-Kaylor and Lee 2020 <sup>66</sup>         | USA         | Fragile Families and Child Wellbeing Study                           | 2472        | Fixed effects models       | Aggressive behaviour               | 2 years; age at baseline 3 years                 | Detrimental            | Not moderated by community violence                  |
| Maguire-Jack, Gromoske and Berger 2012 <sup>67</sup> | USA         | Fragile Families and Child Wellbeing Study                           | 3870        | Cross-lagged path analysis | Aggressive behaviour               | 4 years; age at baseline 1 year; 3 time points   | Detrimental            | Reciprocal effects                                   |
| Neaverson et al. 2020 <sup>73</sup>                  | Switzerland | Zurich Project on the Social Development from Childhood to Adulthood | 1447        | Cross-lagged path analysis | Aggressive behaviour               | 2 years; age at baseline 11 years; 3 time points | Detrimental            |                                                      |
| Olson et al. 2011 <sup>74</sup>                      | USA         | Children at risk of school-age conduct problems                      | 199         | Regression models          | Peer aggression                    | 3 years; age at baseline 3 years                 | Detrimental            | Not moderated by child sex or parental warmth        |
| Piche et al. 2017 <sup>72</sup>                      | Canada      | Quebec Longitudinal Study of Child Development                       | 1686        | Regression models          | Physical aggression                | 2 years; age at baseline 3 years                 | Detrimental            | Not moderated by child temperament                   |
| Stacks et al. 2009 <sup>75</sup>                     | USA         | Early Head Start Research and Evaluation Study                       | 3001        | Regression models          | Aggressive behaviour               | 2 years; age at baseline 1 year; 3 time points   | No associations        |                                                      |

| Author/ year                                   | Country | Dataset / study population                     | Sample size | Analysis method                           | Outcome(s) as described by authors | Follow up period                               | Findings (main effect)                                                                                         | Comments                                                         |
|------------------------------------------------|---------|------------------------------------------------|-------------|-------------------------------------------|------------------------------------|------------------------------------------------|----------------------------------------------------------------------------------------------------------------|------------------------------------------------------------------|
| Taylor et al. 2010 <sup>68</sup>               | USA     | Fragile Families and Child Wellbeing Study     | 2461        | Regression models                         | Aggressive behaviour               | 2 years; age at baseline 3 years               | Detrimental                                                                                                    |                                                                  |
| Turns and Sibley 2018 <sup>69</sup>            | USA     | Fragile Families and Child Wellbeing Study     | 1020        | Cross-lagged path analysis                | Bullying behaviour                 | 8 years; age at baseline 1 year; 4 time points | No main effect; Mixed: detrimental for boys /beneficial for girls (age 1 to 3 only; age 3 to 5 no association) | Moderation by child sex                                          |
| Ward et al. 2019 <sup>70</sup>                 | USA     | Fragile Families and Child Wellbeing Study     | 3632        | Cross-lagged path analysis                | Aggressive behaviour               | 4 years; age at baseline 1 year; 3 time points | Detrimental                                                                                                    | Not moderated by race/ethnicity; reciprocal effects              |
| Ward et al. 2020 <sup>71</sup>                 | USA     | Fragile Families and Child Wellbeing Study     | 2211        | Cross-lagged path analysis                | Aggressive behaviour               | 4 years; age at baseline 1 year; 3 time points | Detrimental                                                                                                    | Moderation by maternal attachment; reciprocal effects            |
| <b>Antisocial behaviour / conduct problems</b> |         |                                                |             |                                           |                                    |                                                |                                                                                                                |                                                                  |
| Derella et al. 2020 <sup>78</sup>              | USA     | Pittsburgh Girls Study                         | 2450        | Regression models with lagged predictors  | Oppositional Defiant Disorder      | 12 years; age at baseline 5-8 years            | Detrimental                                                                                                    |                                                                  |
| Ellison, Musick and Holden 2011 <sup>76</sup>  | USA     | National Survey of Families and Households     | 456         | Regression models                         | Antisocial behaviour               | 5 years; age at baseline 2-4 years             | Detrimental                                                                                                    | Moderation by religious affiliation                              |
| Grogan-Kaylor 2004 <sup>23</sup>               | USA     | National Longitudinal Survey of Youth          | 1811        | Fixed effects models                      | Antisocial behaviour               | 4 years; mean age 10 years                     | Detrimental                                                                                                    | Not moderated by race/ethnicity; no dose-response                |
| Grogan-Kaylor 2005b <sup>24</sup>              | USA     | National Longitudinal Survey of Youth          | 6912        | Hierarchical linear models                | Antisocial behaviour               | 10 years; age at baseline 4 years              | Detrimental                                                                                                    | Not moderated by race/ethnicity; moderation by child age and sex |
| Lahey et al. 2008 <sup>26</sup>                | USA     | National Longitudinal Survey of Youth          | 1,863       | GEE models                                | Conduct problems                   | 10 years (age 4 to 14)                         | No associations                                                                                                | Moderation by race/ethnicity                                     |
| Larzelere, Cox and Smith 2010 <sup>25</sup>    | USA     | National Longitudinal Survey of Youth          | 785         | Regression and structural equation models | Antisocial behaviour               | 2 years; age at baseline 6-9 years             | No associations                                                                                                |                                                                  |
| Piche et al. 2017 <sup>72</sup>                | Canada  | Quebec Longitudinal Study of Child Development | 1686        | Regression models                         | Conduct problems                   | 2 years; age at baseline 3 years               | Detrimental                                                                                                    | Not moderated by child temperament                               |

| Author/ year                                         | Country | Dataset / study population                                                 | Sample size | Analysis method            | Outcome(s) as described by authors | Follow up period                                 | Findings (main effect)                                            | Comments                                                               |
|------------------------------------------------------|---------|----------------------------------------------------------------------------|-------------|----------------------------|------------------------------------|--------------------------------------------------|-------------------------------------------------------------------|------------------------------------------------------------------------|
| Wang and Kenny 2014 <sup>77</sup>                    | USA     | Longitudinal Study of Youth Development                                    | 862         | Cross-lagged path analysis | Conduct problems                   | 4 years; age at baseline 12 years; 3 time points | Detrimental                                                       | Not moderated by race/ethnicity or parental warmth; reciprocal effects |
| <b>Internalising behaviour</b>                       |         |                                                                            |             |                            |                                    |                                                  |                                                                   |                                                                        |
| Bakoula et al. 2009 <sup>22</sup>                    | Greece  | Greek Birth Cohort                                                         | 2065        | Regression models          | Internalising behaviour            | 11 years; age at baseline 7 years                | Mixed: beneficial for girls / no association for boys             | Moderation by child sex                                                |
| Barajas-Gonzalez et al. 2018 <sup>54</sup>           | USA     | Mexican and Dominican American immigrant families                          | 633         | Regression models          | Internalising behaviour            | 1 year; age at baseline 4 years                  | No associations                                                   |                                                                        |
| Baumrind, Larzelere and Owens 2010 <sup>55</sup>     | USA     | Baumrind's Family Socialization Project                                    | 87          | MANCOVA; regression models | Internalising behaviour            | 10 years, mean age at baseline 5 years           | No associations                                                   |                                                                        |
| Coley, Kull and Carrano 2014 <sup>27</sup>           | USA     | Three City Study - low-income urban African American and Hispanic families | 592         | Cross-lagged path analysis | Internalising behaviour            | 6 years; age at baseline 3 years; 3 time points  | Mixed: beneficial wave 1 to wave 2 / detrimental wave 2 to wave 3 | Moderation by race/ethnicity; no reciprocal effects                    |
| Ellison, Musick and Holden 2011 <sup>76</sup>        | USA     | National Survey of Families and Households                                 | 456         | Regression models          | Internalising behaviour            | 5 years; age at baseline 2-4 years               | Detrimental                                                       |                                                                        |
| Grogan-Kaylor 2005a <sup>47</sup>                    | USA     | National Longitudinal Survey of Youth                                      | 1943        | Fixed effects models       | Internalising behaviour            | 6 years; age 4-14 years; 4 time points           | No associations                                                   |                                                                        |
| Gromoske and Maguire-Jack 2012 <sup>59</sup>         | USA     | Fragile Families and Child Wellbeing Study                                 | 3870        | Cross-lagged path analysis | Internalising behaviour            | 4 years; age at baseline 1 year; 3 time points   | Detrimental                                                       | No reciprocal effects                                                  |
| Ma and Grogan-Kaylor 2017 <sup>64</sup>              | USA     | Fragile Families and Child Wellbeing Study                                 | 3705        | Hierarchical linear models | Internalising behaviour            | 2 years; age at baseline 3 years                 | Detrimental                                                       |                                                                        |
| Ma, Grogan-Kaylor and Lee 2020 <sup>66</sup>         | USA     | Fragile Families and Child Wellbeing Study                                 | 2472        | Fixed effects models       | Internalising behaviour            | 2 years; age at baseline 3 years                 | Detrimental                                                       | Not moderated by community violence                                    |
| Maguire-Jack, Gromoske and Berger 2012 <sup>67</sup> | USA     | Fragile Families and Child Wellbeing Study                                 | 3870        | Cross-lagged path analysis | Internalising behaviour            | 4 years; age at baseline 1 year; 3 time points   | Detrimental                                                       | No reciprocal effects                                                  |



| Author/ year                                                               | Country | Dataset / study population                                                                               | Sample size | Analysis method            | Outcome(s) as described by authors | Follow up period                                  | Findings (main effect)                                                                        | Comments                                                                  |
|----------------------------------------------------------------------------|---------|----------------------------------------------------------------------------------------------------------|-------------|----------------------------|------------------------------------|---------------------------------------------------|-----------------------------------------------------------------------------------------------|---------------------------------------------------------------------------|
| Mulvaney and Mebert 2007 <sup>52</sup>                                     | USA     | National Institute of Child Health and Human Development Study of Early Child Care and Youth Development | 1028        | Regression models          | Internalising behaviour            | 6 years; age at baseline 15 months; 4 time points | Detrimental                                                                                   | Not moderated by race/ethnicity                                           |
| Petts and Kysar-Moon 2012 <sup>39</sup>                                    | USA     | Fragile Families and Child Wellbeing Study                                                               | 1214        | Regression models          | Internalising behaviour            | 2 years; age at baseline 3 years                  | Detrimental                                                                                   | Not moderated by religious affiliation                                    |
| Wang and Kenny 2014 <sup>77</sup>                                          | USA     | Longitudinal Study of Youth Development                                                                  | 862         | Cross-lagged path analysis | Depressive symptoms                | 4 years; age at baseline 12 years; 3 time points  | Detrimental                                                                                   | Not moderated by race/ethnicity or parental warmth; no reciprocal effects |
| Yoo and Huang 2013 <sup>38</sup>                                           | USA     | Fragile Families and Child Wellbeing Study                                                               | 1234        | Structural equation models | Internalising behaviour            | 5 years; followed from birth; 4 time points       | Detrimental                                                                                   |                                                                           |
| Yu et al. 2018 <sup>53</sup>                                               | USA     | Sample of Chinese Americans                                                                              | 163         | Bayesian path analysis     | Internalising behaviour            | 6 months; age at baseline 3-5 years               | Detrimental                                                                                   |                                                                           |
| <b>Total behaviour problems (combined externalising and internalising)</b> |         |                                                                                                          |             |                            |                                    |                                                   |                                                                                               |                                                                           |
| Ansari and Gershoff 2016 <sup>31</sup>                                     | USA     | Family and Child Experiences Survey, 2006 cohort                                                         | 1020        | Structural equation models | Behaviour problems                 | 2 years; age at baseline 41 months; 3 time points | Detrimental                                                                                   |                                                                           |
| Keyser, Ahn and Unick 2017 <sup>79</sup>                                   | USA     | Fragile Families and Child Wellbeing Study                                                               | 4898        | Growth curve models        | Problem behaviour                  | 6 years; age at baseline 3 years; 3 time points   | Detrimental                                                                                   |                                                                           |
| McLoyd and Smith 2002 <sup>28</sup>                                        | USA     | National Longitudinal Survey of Youth                                                                    | 1990        | Growth curve models        | Behaviour problems                 | 6 years; age at baseline 4-5 years; 4 time points | Detrimental                                                                                   | Moderation by maternal emotional support; no moderation by race/ethnicity |
| Okuzono et al. 2017 <sup>80</sup>                                          | Japan   | Longitudinal Survey of Newborns in the 21 <sup>st</sup> Century                                          | 29 182      | Propensity Score Matching  | Behaviour problems                 | 2 years; age at baseline 3.5 years                | Detrimental                                                                                   | Dose-response                                                             |
| Scott et al. 2014 <sup>81</sup>                                            | UK      | Growing Up in Scotland Study                                                                             | 1600        | Regression models          | Emotional and behavioural problems | 2 years; age at baseline 2 years                  | Detrimental                                                                                   |                                                                           |
| Slade and Wissow 2004 <sup>29</sup>                                        | USA     | National Longitudinal Survey of Youth                                                                    | 1966        | Probit models              | Behaviour problems                 | 4 years; age at baseline 0-23 months              | No main effect; Mixed: detrimental / no association for Hispanic or African American children | Moderation by race/ethnicity                                              |

| Author/ year                                     | Country  | Dataset / study population                                                            | Sample size | Analysis method                                                                                          | Outcome(s) as described by authors                    | Follow up period                                  | Findings (main effect)                                                            | Comments                        |
|--------------------------------------------------|----------|---------------------------------------------------------------------------------------|-------------|----------------------------------------------------------------------------------------------------------|-------------------------------------------------------|---------------------------------------------------|-----------------------------------------------------------------------------------|---------------------------------|
| <b>Prosocial behaviour / social competence</b>   |          |                                                                                       |             |                                                                                                          |                                                       |                                                   |                                                                                   |                                 |
| Altschul, Lee and Gershoff 2016 <sup>57</sup>    | USA      | Fragile Families and Child Wellbeing Study                                            | 3279        | Cross-lagged path analysis                                                                               | Child social competence                               | 2 years; age at baseline 3 years                  | No associations                                                                   | No reciprocal effects           |
| Baumrind, Larzelere and Owens 2010 <sup>55</sup> | USA      | Baumrind's Family Socialization Project                                               | 87          | MANCOVA; regression models                                                                               | Adolescent competence                                 | 10 years, mean age at baseline 5 years            | No associations                                                                   |                                 |
| Gershoff et al. 2016 <sup>30</sup>               | USA      | Head Start Impact Study                                                               | 2063        | Cross-lagged path analysis                                                                               | Social skills                                         | 1.5 years; age at baseline 3 years; 3 time points | No associations                                                                   |                                 |
| Piche et al. 2017 <sup>72</sup>                  | Canada   | Quebec Longitudinal Study of Child Development                                        | 1686        | Regression models                                                                                        | Prosocial behaviour                                   | 2 years; age at baseline 3 years                  | No associations                                                                   | Moderation by sex               |
| Yu et al. 2018 <sup>53</sup>                     | USA      | Sample of Chinese Americans                                                           | 163         | Bayesian path analysis                                                                                   | Prosocial behaviour                                   | 6 months; age at baseline 3-5 years               | No associations                                                                   |                                 |
| <b>Inattention / ADHD symptoms</b>               |          |                                                                                       |             |                                                                                                          |                                                       |                                                   |                                                                                   |                                 |
| Gershoff et al. 2016 <sup>30</sup>               | USA      | Head Start Impact Study                                                               | 2063        | Cross-lagged path analysis                                                                               | Inattention                                           | 1.5 years; age at baseline 3 years; 3 time points | No associations                                                                   |                                 |
| Morgan et al. 2016 <sup>82</sup>                 | USA      | Early Childhood Longitudinal Study – Kindergarten Cohort                              | 7456        | Regression models                                                                                        | ADHD / ADHD-CD symptoms                               | 8 years; age at baseline 5 years                  | Detrimental                                                                       | Not moderated by race/ethnicity |
| <b>Cognitive abilities</b>                       |          |                                                                                       |             |                                                                                                          |                                                       |                                                   |                                                                                   |                                 |
| Ansari and Gershoff 2016 <sup>31</sup>           | USA      | Family and Child Experiences Survey, 2006 cohort                                      | 1020        | Structural equation models                                                                               | Approaches to learning; literacy skills; maths skills | 2 years; age at baseline 41 months; 3 time points | Mixed: detrimental for approaches to learning; no associations for literacy/maths |                                 |
| Cuartas et al. 2020 <sup>83</sup>                | Colombia | Sample of low income Colombian children living in 95 municipalities; data from an RCT | 1167        | lagged-dependent variables; difference-in-differences-like approach (DD); DD-like approach with matching | Cognitive skills                                      | 2 years; age at baseline 1.5 years                | Detrimental                                                                       |                                 |

| Author/ year                                         | Country | Dataset / study population                                                         | Sample size | Analysis method             | Outcome(s) as described by authors                                               | Follow up period                                   | Findings (main effect)                                                                | Comments                                                                                                |
|------------------------------------------------------|---------|------------------------------------------------------------------------------------|-------------|-----------------------------|----------------------------------------------------------------------------------|----------------------------------------------------|---------------------------------------------------------------------------------------|---------------------------------------------------------------------------------------------------------|
| Font and Cage 2018 <sup>32</sup>                     | USA     | CPS-involved children from National Survey of Child and Adolescent Well-Being      | 658         | Mixed-effects linear models | School engagement; cognitive performance                                         | 3 years; age at baseline 8-14 years; 3 time points | Mixed: detrimental for school engagement; beneficial for cognitive performance        |                                                                                                         |
| Gershoff et al. 2016 <sup>30</sup>                   | USA     | Head Start Impact Study                                                            | 2063        | Cross-lagged path analysis  | Literacy skills (receptive vocabulary, letter-word identification, and spelling) | 1.5 years; age at baseline 3 years; 3 time points  | Mixed: detrimental for receptive vocabulary only; NS for letter-word; NS for spelling |                                                                                                         |
| MacKenzie et al. 2012 <sup>36</sup>                  | USA     | Fragile Families and Child Wellbeing Study                                         | 779         | Regression models           | Receptive vocabulary                                                             | 2 years; age at baseline 3 years                   | Detrimental                                                                           |                                                                                                         |
| MacKenzie et al. 2013 <sup>37</sup>                  | USA     | Fragile Families and Child Wellbeing Study                                         | 1933        | Regression models           | Receptive vocabulary                                                             | 6 years; age at baseline 3 years                   | No associations                                                                       |                                                                                                         |
| Maguire-Jack, Gromoske and Berger 2012 <sup>67</sup> | USA     | Fragile Families and Child Wellbeing Study                                         | 3870        | Cross-lagged path analysis  | Cognitive skills via vocabulary test                                             | 4 years; age at baseline 1 year; 3 time points     | No associations                                                                       | No reciprocal effects                                                                                   |
| Straus and Paschall 2009 <sup>84</sup>               | USA     | National Longitudinal Survey of Youth                                              | 806         | ANCOVA, regression models   | Maths and reading achievement tests                                              | 4 years; age at baseline 2-4 years and 5-9 years   | Detrimental                                                                           | Not moderated by race/ethnicity, maternal supportiveness, maternal cognitive stimulation; dose-response |
| <b>Interpersonal relationships</b>                   |         |                                                                                    |             |                             |                                                                                  |                                                    |                                                                                       |                                                                                                         |
| Font and Cage 2018 <sup>32</sup>                     | USA     | CPS-involved children from National Survey of Child and Adolescent Well-Being      | 658         | Mixed-effects linear models | Peer isolation                                                                   | 3 years; age at baseline 8-14 years; 3 time points | No associations                                                                       |                                                                                                         |
| Laible et al. 2020 <sup>51</sup>                     | USA     | National Institute of Child Health and Human Development Study of Early Child Care | 1364        | Cross-lagged path analysis  | Quality of parent-child interactions                                             | 5 years; age at baseline 3 years; 4 time points    | Detrimental                                                                           | Reciprocal effects                                                                                      |
| Foshee et al. 2005 <sup>33</sup>                     | USA     | Evaluation of "Safe Dates" violence prevention programme                           | 1218        | Regression models           | Dating violence                                                                  | 1.5 years; age at baseline 14 years                | NS for single mothers; detrimental for married mothers, NS for married fathers        | Moderated by maternal education and race/ethnicity                                                      |

| Author/ year                                       | Country | Dataset / study population                              | Sample size | Analysis method                      | Outcome(s) as described by authors                                          | Follow up period                 | Findings (main effect) | Comments                                                        |
|----------------------------------------------------|---------|---------------------------------------------------------|-------------|--------------------------------------|-----------------------------------------------------------------------------|----------------------------------|------------------------|-----------------------------------------------------------------|
| <b>Stress reactivity</b>                           |         |                                                         |             |                                      |                                                                             |                                  |                        |                                                                 |
| Bugental, Martorell and Barraza 2003 <sup>85</sup> | USA     | Low-income mothers at risk of future child maltreatment | 44          | Regression models                    | Children's cortisol production after exposure to the Strange Situation test | < 1 year; age at baseline 1 year | Detrimental            |                                                                 |
| <b>Involvement with child protective services</b>  |         |                                                         |             |                                      |                                                                             |                                  |                        |                                                                 |
| Lee, Grogan-Kaylor and Berger 2014 <sup>87</sup>   | USA     | Fragile Families and Child Wellbeing Study              | 2788        | Regression models                    | Child Protective Services (CPS) involvement between age 1 and 5 years       | 4 years; age at baseline 1 year  | Detrimental            |                                                                 |
| Ma, Grogan-Kaylor and Klein 2018 <sup>88</sup>     | USA     | Fragile Families and Child Wellbeing Study              | 2267        | Regression models                    | Child Protective Services (CPS) involvement between age 3 and 5 years       | 2 years; age at baseline 3 years | Detrimental            |                                                                 |
| Slack et al. 2004 <sup>86</sup>                    | USA     | Illinois Family Study                                   | 583         | Discrete time event history analysis | Physical neglect via Child Protective Services reports                      | 1 year; age at baseline 3 years  | Detrimental            | Controlled for prior involvement with child protective services |
